# 1 From a single host to global spread: The global 2 mobility based modelling of the COVID-19 pandemic 3 implies higher infection rate and lower detection ratio 4 than current estimates.

5 Marian Siwiak PhD 1, Pawel Szczesny PhD 1, Marlena Siwiak PhD 1  
6 1 Data 3.0, Sevenoaks, TN14 7TG, UK  
7 Corresponding Author:  
8 Marian P. Siwiak PhD 1  
9 3 Forge Way, Sevenoaks, TN14 7TG, United Kingdom  
10 Email address: [siwiak@data30.co.uk](mailto:siwiak@data30.co.uk)

## 11 Abstract

### 12 Background

13 Since the outbreak of the COVID-19 pandemic, multiple efforts of modelling of the geo-  
14 temporal transmissibility of the virus have been undertaken, but none describes the pandemic  
15 spread at the global level. The aim of this research is to provide a high-resolution global model  
16 of the pandemic that overcomes the problem of biased country-level data on the number of  
17 infected cases. To achieve this we propose a novel SIR-type metapopulation transmission model  
18 and a set of analytically derived model parameters. We used them to perform a simulation of the  
19 disease spread with help of the Global Epidemic and Mobility (GLEAM) framework embedding  
20 actual population densities, commute patterns and long-range travel networks. The simulation  
21 starts on Nov 17<sup>th</sup>, 2019 with just a single pre-symptomatic, yet infectious, case in Wuhan,  
22 China, and results in an accurate prediction of the number of diagnosed cases after 154 days in  
23 multiple countries across five continents. In addition, the model outcome shows high compliance  
24 with the results of a random screening test conducted on pregnant women in the New York area.

### 25 Methods

26 We have built a modified SIR metapopulation transmission model and parameterized it  
27 analytically either by setting the values of the parameters based on the literature, or by assuming  
28 their plausible values. We compared our results with the number of diagnosed cases in twenty  
29 selected countries which provide reliable statistics but differ substantially in terms of strength  
30 and speed of undertaken Non-Drug Interventions. The obtained 95% confidence intervals for the  
31 predictions are in agreement with the empirical data.

### 32 Results

33 The parameters that successfully model the pandemic are: the basic reproduction number  $R_0$ , 4.4;  
34 a latent non-infectious period of 1.1. days followed by 4.6 days of the presymptomatic infectious  
35 period; the probability of developing severe symptoms, 0.01; the probability of being diagnosed  
36 when presenting severe symptoms of 0.6; the probability of diagnosis for cases with mild  
37 symptoms or asymptomatic, 0.001.

## 38 Discussion

39 Parameters that successfully reproduce the observed number of cases indicate that both  $R_0$  and  
40 the prevalence of the virus might be underestimated. This is in concordance with the newest  
41 research on undocumented COVID-19 cases. Consequently, the actual mortality rate is  
42 putatively lower than estimated. Confirmation of the pandemic characteristic by further  
43 refinement of the model and screening tests is crucial for developing an effective strategy for the  
44 global epidemiological crisis.

## 45 Introduction

46 As of April 23<sup>rd</sup>, 2020, novel coronavirus SARS-CoV-2 has already spread into 185 countries  
47 and territories around the world (Dong, Du & Gardner, 2020). With over two and half a million  
48 confirmed infections and over 180 thousand deaths (Dong, Du & Gardner, 2020), it became a  
49 global challenge. COVID-19, the disease caused by this coronavirus, was characterised as a  
50 pandemic by WHO on March 11<sup>th</sup>, 2020.

51 While several different measures to contain the virus have been implemented by countries all  
52 over the world, their effectiveness remains to be seen. Until an effective treatment is available,  
53 the accuracy of the pandemic models and the decisions made on their basis are the major factors  
54 in reducing the overall mortality in the COVID-19 pandemic.

55 The models used to inform decision-makers differ significantly in their basic assumptions  
56 because it is the first coronavirus of such an impact in terms of the number of fatal cases.  
57 Moreover, the existing modelling approaches often use biased data for tuning parameters or  
58 assessing models' quality. In particular, most models use country-level data which is biased by  
59 one or many of the following factors: (i) level of transparency in acquiring, analysing,  
60 interpreting and reporting of data, (ii) level of detection effort, (iii) efficiency of introduced Non-  
61 Drug Interventions, (iv) biased sampling of people to be tested (individuals showing severe and  
62 typical symptoms or suspected of having a contact with an infected person are more likely to be  
63 tested). The bias in data could be avoided by conducting well designed, random screening tests,  
64 but so far just a few such attempts have been made and they were limited to small and isolated  
65 communities in Italy (Lavezzo et al., 2020), and Germany (Streeck et al., 2020), or women  
66 admitted for delivery (Sutton et al., 2020).

67 Also, as of the date of submitting this work, there were no peer-reviewed geo-temporal models  
68 of the pandemic. We argue that creating a global model by fitting curves to observed data is  
69 impossible, unless the data used in this exercise is a result of large scale screening tests. As  
70 mentioned above, country-level data is biased and the nature of this bias is different for each  
71 country, mainly reflecting state policy towards the disease. Obviously, fitting model curves on  
72 global data bears a significant error, as this data is a mixture of all country-level biases.

73 Even the proper characteristic of the virus is hampered by the above-mentioned biases. For  
74 instance, early estimates of the basic reproduction number of the virus,  $R_0$ , were typically  
75 obtained using only Chinese data on the number of diagnosed cases (Zhang et al., 2020; Wu,  
76 Leung & Leung, 2020; Liu et al., 2020). These estimates proposed the value of  $R_0$  within the  
77 range 1.5-6.47, and the earliest most likely served as the basis for the January's official WHO  
78 estimate, which stated  $R_0=1.4-2.5$  ("Statement on the meeting of the International Health  
79 Regulations (2005) Emergency Committee regarding the outbreak of novel coronavirus 2019 (n-  
80 CoV) on 23 January 2020"). However, re-analysis of Chinese data provided an updated estimate  
81 of 5.7 (95% CI 3.8-8.9) (Steven Sanche et al., 2020).

82 Similar problems arise when estimating the actual prevalence of the virus. In this case, the  
83 estimates are not only biased by the state policy, but also by the fact that many infections are  
84 mild, asymptomatic or with atypical symptoms. In fact, many COVID-19 cases pass unnoticed,  
85 for instance in Li's and coworkers China study, over 50% (Li et al., 2020a).

86 The main objective of this research is to create a global model of the early stages of the  
87 pandemic that would overcome the problem of the biased data on the number of infected cases.  
88 This goal was achieved by creating a first global model of the COVID-19 pandemic that builds  
89 on top of the successful modelling framework GLEAM (Van den Broeck et al., 2011). In  
90 contrast to many existing models, our attempt did not use biased country-level data on the  
91 number of infected cases to fit the model curve. Instead, it used a set of predefined parameters to  
92 simulate the spread of the disease around the world starting from a single infected host in  
93 Wuhan, China on Nov 17<sup>th</sup>, 2019. The exact date was suggested by unverified press reports and  
94 used widely as a date of a disease contraction for "patient zero", but evolutionary tracing also  
95 suggests a similar timepoint (Li et al., 2020b). The simulation took into account the current  
96 population densities all over the world, actual commute and flight networks, and travel ability of  
97 infected individuals. The simulation was run with 20 iterations for 154 days till Apr 19<sup>th</sup>, 2020.  
98 The obtained results were used to create 95% confidence intervals for curves of cumulative  
99 number of diagnosed cases, separately for each country in the world.

100 To assess the quality of our model, its results should be compared to the observed data on the  
101 number of diagnosed cases, but this data suffers from four biases, listed above. These biases  
102 cannot be totally eliminated, but careful selection of countries used in the analysis may reduce  
103 their impact significantly. In particular, we limited the analysis of model results to twenty  
104 countries which to our belief provide the most accurate and transparent reports on the number of  
105 infected cases (reducing bias nr 1). Selected countries are also divergent in terms of their  
106 detection efforts illustrated by the number of conducted tests per capita (reducing bias nr 2).  
107 Additionally, our model depicts the early stages of the pandemic when Non-Drug Interventions  
108 were not yet introduced on a large scale in the selected countries, and if they were, the exact time  
109 of intervention was added to the final diagrams to show its impact on the number of diagnosed  
110 cases (reducing bias nr 3). Furthermore, the proportion of symptomatic versus mild and  
111 asymptomatic cases is built in the model, so is the fact that symptomatic individuals are more  
112 likely to be tested (reducing bias nr 4). Finally, the detectability of the disease is also built in the  
113 model. This means that the presented confidence intervals depict the plausible range of  
114 diagnosed cases assuming a given detectability, not the actual number of infected individuals in  
115 the country. However, the latter may easily be assessed knowing the assumed detectability, or  
116 derived from the model file provided with this paper.

117 The presented model enables better understanding of the virus, its infectivity and detectability.  
118 Also, it may serve as a solid foundation for further attempts of global and country-level  
119 modelling. In particular, more detailed models that include information on introduced  
120 precautions may be created by making the detectability parameter variable in time and  
121 geographics. This would enable an optimal pandemic strategy to be established for each country.

## 122 **Materials & Methods**

### 123 **Modelling software**

124 The model is based on the Global Epidemic and Mobility Model (GLEAM) framework (Balcan  
125 et al., 2010), implemented in the GLEAMviz software (Van den Broeck et al., 2011). The  
126 GLEAM model integrates sociodemographic and population mobility data in a spatially  
127 structured stochastic disease approach to simulate the spread of epidemics at a worldwide scale.  
128 It was previously used for a real-time numerical forecast of the global spreading of Influenza  
129 A/H1N1 (Tizzoni et al., 2012), and the accuracy of that modelling was later confirmed (Tizzoni  
130 et al., 2012).

### 131 **Data sources**

132 The reference data about the number of SARS-CoV-2 diagnosed patients in the period from Jan  
133 22, 2020, to Apr 19<sup>th</sup>, 2020, were downloaded from the Johns Hopkins University of Medicine  
134 Coronavirus Resource Center GitHub repository <https://github.com/CSSEGISandData/COVID-19>.  
135 The provided data have been grouped by country. These data sources were used to assess the  
136 quality of the model results. Empirical data for the time preceding Jan 22<sup>nd</sup>, 2020 is not available  
137 in the cited source.

138 Information about the severity of developed symptoms was derived from the worldometer.info  
139 website <https://www.worldometers.info/coronavirus/>.

140 Information on testing efforts in selected countries, comes from the  
141 <https://ourworldindata.org/coronavirus-testing-source-data> website.

142 Approximation of the number of mild and asymptomatic cases in the New York area was derived  
143 from the results of a random screening test performed on women admitted for delivery at the  
144 New York–Presbyterian Allen Hospital and Columbia University Irving Medical Center (Sutton  
145 et al., 2020).

146 Information on introduced Non-Drug Interventions comes from publicly available sources.

147 Other data sources, such as subpopulation selection, commuting patterns, or air travel flows,  
148 used during simulation, are embedded in the GLEAM software and well described by its  
149 developers (Van den Broeck et al., 2011).

### 150 **Model parametrization**

151 Below and in **Table 1**, we present a set of parameters that was used in the model. Most  
152 parameters were derived from the literature. In the absence of a reliable reference, the parameters  
153 were assigned with the most plausible values by the authors based on the epidemiological  
154 knowledge on SARS-CoV-2 and other viruses. The parameters' derivation method is  
155 summarized in **Table 1**.

156 The average latency period (*lp*) of 5.6 days is a consensus of different estimations calculated  
157 previously (Lauer et al., 2020). Due to 1) long *lp*, effectively much longer than reported for other  
158 coronaviruses, and 2) known cases of presymptomatic transmission (Woelfel et al., 2020; Tong  
159 et al., 2020), for the modelling purposes we decided to split the latency period into two parts: 1)  
160 average latent non-infectious period (*lnip*) of 1.1 days (based on the time of infectivity for other  
161 viruses (Wallinga & Teunis, 2004)), and 2) average presymptomatic infectious period (*pip*) of  
162 4.5 days. This split produces two parameters used in the model:

163 1) latency rate for the non-infectious period - non-infectious epsilon ( $ni\varepsilon$ ):

$$164 \quad ni\varepsilon = 1/lnip,$$

165 and

166 2) latency rate for the infectious period - latency rate infectious epsilon ( $i\varepsilon$ ):

$$167 \quad i\varepsilon = 1/(lp - lnip).$$

168 As the Republic of Korea provided high quality, reliable data and conducted a large number of  
169 tests during the pandemic, we decided to use Korean proportion of “severe” to diagnosed cases  
170 as a base for the probability of developing the severe condition ( $pS$ ), and we set it to  $0.01$ . We  
171 assumed that patients with mild symptoms, in contrast to those in severe condition, are still  
172 capable of travelling. For model simplicity, we decided to merge into one compartment all mild  
173 and asymptomatic cases.

174

175 We decided to set the probability of detection of severe infection ( $pDS$ ) to  $0.6$ , in order to mimic  
176 two obstacles, typically preventing proper accurate diagnosis. Firstly, the majority of patients  
177 with a severe course of the disease are either chronically ill or above 60 (Zhou et al., 2020) -  
178 their symptoms might be mistaken with those caused by their general health condition, and thus  
179 not reported on time. Secondly, the model is supposed to reflect the average illness detection  
180 around the globe, which includes many countries with low quality or underfinanced healthcare,  
181 where the number of SARS-CoV-2 tests is very limited.

182

183 Another parameter of the model,  $pDM$  is the probability of being diagnosed with COVID-19  
184 when having either mild symptoms or an asymptomatic illness course. This parameter depends  
185 on previously defined  $pS$  and  $pDS$ , as well as the ratio of total diagnosed to undiagnosed cases  
186 ( $tDR$ ):

$$187 \quad pDM = (tDR - pS * pDS) \div (1 - pS).$$

188 Knowing the limitations of previous modelling attempts (Cowling et al.; Ganyani et al., 2020;  
189 Zhang et al., 2020; Chen et al., 2020; Wu, Leung & Leung, 2020; Lin et al., 2020; Kucharski et  
190 al., 2020), we decided to test a radically different COVID-19 epidemiologic paradigm, i.e. a  
191 significantly lower  $tDR$ . It means that in our model, we assume a higher proportion of undetected  
192 cases in comparison to other models proposed so far. Taking into account that none of them was  
193 capable of providing a plausible global simulation of the pandemic, plus the fact that the  
194 potentially low detectability has already been discussed in the literature (Nishiura et al., 2020; Li  
195 et al., 2020a; Day, 2020a,b; Kimball et al., 2020), we decided to test such a possibility in  
196 simulation by setting the lowest possible  $tDR$ . Its relation to  $pDM$  sets its minimum to:

$$197 \quad tDR > pS * pDS.$$

198 For previously set  $pS$  and  $pDS$  values,  $tDR$  must be greater than  $0.006$ , thus the value used in our  
199 simulation was set to  $0.0061$ . This value means that for 10,000 of COVID-19 cases only 61 are  
200 positively diagnosed. The justification for such a strong assumption is based on the following:  
201 (i)  $tDR$  reflects the average global detectability of the virus, including countries of low quality of  
202 public healthcare; (ii)  $tDR$  reflects the average detectability of the virus during the entire  
203 examined period of 154 days that describes early stages of the pandemic; (iii) the percentage of  
204 asymptomatic or atypical cases is currently unknown, but small-scale screening tests conducted  
205 so far indicate that even 88% of examined diagnosed cases could be asymptomatic (Sutton et al.,  
206 2020); and (iv) some of the currently used tests might be faulty e.g. when viral load is small (Pan  
207 et al., 2020).

208



209 Other important and interconnected parameters required by the model are as follows: the  
210 effective contact rate,  $\beta$ ; its reduction level for patients who developed severe symptoms of the  
211 disease but were not diagnosed,  $r\beta$ ; and average recovery time since symptoms development  $\mu$ .  
212 The parameter  $\beta$  is derived from the time a host remains infectious,  $d$ , and the basic reproduction  
213 number of the virus,  $R_0$ :

$$214 \quad \beta = R_0 \div d ,$$

215 where:

$$216 \quad d = \mu + pip.$$

217 The estimation of  $R_0$  is a topic widely discussed in the literature, with values ranging from 1.4 to  
218 6.49 (“Statement on the second meeting of the International Health Regulations (2005)  
219 Emergency Committee regarding the outbreak of novel coronavirus (2019-nCoV)”); Majumder &  
220 Mandl; Zhao et al.; Imai et al., 2020; Read et al., 2020; Liu et al., 2020). However, following the  
221 assumption of much higher than the currently suspected ratio of undiagnosed cases, we decided  
222 to use in our model a higher rate of transmissibility, yet well within the range of 2-5, modelled  
223 for SARS (Wallinga & Teunis, 2004). The  $R_0$  value assumed in our model is 4.4.

224 In our study  $\mu$  is derived from a safe quarantine period for diagnosed cases (Woelfel et al., 2020).  
225 As the safe quarantine time is estimated to be 10 days (Woelfel et al., 2020), we assumed  $\mu$  to  
226 last on average for 7 days from symptoms development to recovery. The sum of  $\mu$  and  
227 previously estimated  $pip$  (presymptomatic infectious period) results in  $d$  equal to 11.5 days, and  
228  $\beta$  equal to 0.38261.

229 We decided to set  $r\beta$  to 0.5, following the assumption for this parameter used in GLEAM  
230 modelling of the 2009 influenza outbreak (Balcan et al., 2010). Patients who were diagnosed  
231 with COVID-19 are assumed isolated and as such, not spreading the disease any further.

## 232 **Model compartmentalization**

233 To model the virus spread, we modified the compartmental SIR metapopulation transmission  
234 model to represent the nature of the COVID-19 epidemic.

235 In our model, we used seven different compartments (**Figure 1**).

- 236 1. Susceptible population - equal to the general global population. We assume no existing  
237 immunity to infection.
- 238 2. Latent non-infectious - infected population in the first incubation stage, not yet infectious.
- 239 3. Presymptomatic infectious - infected population already infectious, but without  
240 developed symptoms.
- 241 4. Mild symptoms - joint populations of asymptomatic cases and those with inconspicuous  
242 symptoms.
- 243 5. Severe symptoms - population infected by SARS-CoV-2 with symptoms affecting their  
244 travel ability.
- 245 6. Diagnosed - population identified as infected with the SARS-CoV-2 virus. This is the  
246 reference line for the model accuracy.
- 247 7. Recovered - joint populations of recovered and fatal cases. We assumed recovered  
248 individuals cannot be reinfected, although the only evidence so far is for rhesus macaques  
249 (Ota, 2020) and WHO is still investigating the issue .

250  
251 The last step was necessary to avoid the problem of unknown mortality rate of the virus. It  
252 should be noted that the currently reported mortality rate only applies to diagnosed cases (CFR,  
253 case fatality ratio), and its value still lacks consensus varying from 0.9%-2.1% (Wu et al., 2020).

254 The true mortality rate (IFR, infected fatality ratio) that takes into account all undiagnosed cases  
255 is likely to be much smaller. For China for instance, it has been estimated at 0.66% (Verity et al.,  
256 2020). However, even if we assume that we currently detect all COVID-19 cases, it should not  
257 exceed 3.4% (WHO estimation) and this already is negligible from the perspective of our model  
258 (I.e. artificial increasing of the number of recovered, and thus immune individuals by this  
259 amount should not affect the model's final outcome much).

## 260 **Model running**

261 The prepared model served as an input for 20 runs of GLEAM stochastic simulations. The  
262 GLEAM framework uses high-resolution worldwide population data, allowing for the definition  
263 of subpopulations according to a Voronoi decomposition of the world surface centered on the  
264 locations of International Air Transport Association (IATA)-indexed airports ([www.iata.org](http://www.iata.org)).  
265 Short-range commuting networks for the defined subpopulations are constructed on the basis of  
266 data on the commuting patterns of 29 countries in five continents, generalized to a general  
267 gravity law for commuting flows, reproducing commuting patterns worldwide.  
268 The stochastic simulation of the pandemic was started on Nov 17th, 2019. Although this date is  
269 stated only in non-academic sources, other reports also indicate mid-November as the time of the  
270 pandemic outbreak (Li et al., 2020b). The simulation began with a single presymptomatic  
271 individual located in Wuhan, China, and the development of the pandemic spread was modelled  
272 for 154 days.

## 273 **Model results processing**

274 A single model run yields two sets of results. The first set is the median value and confidence  
275 intervals for the number of individuals per thousand which, at a given day, were moved to each  
276 of the compartments (presented in **Figure 1**). The second set is the median value and confidence  
277 intervals for a cumulative number of individuals per thousand, entering each of the  
278 compartments, until a given day. Both sets of results can be extracted with different resolutions -  
279 globally, by hemisphere, continent, country, or the tessellated area surrounding IATA-registered  
280 airports.

281 For areas selected for detailed analyses of model results (i.e. twenty selected countries and the  
282 New York area), a cumulative number of transitions into a compartment of interest (i.e.  
283 “Diagnosed” and “Mild symptoms” respectively) was multiplied by the area population, and  
284 divided by thousand. The display of the model results was limited to the dates for which the  
285 experimentally derived data was available.

286 In order to compare model results with the random screening test from the New York area  
287 (Sutton et al., 2020), it was necessary to calculate the average number of undiagnosed mild and  
288 asymptomatic cases in this region ( $c_s$ ) for the period covered by the experiment. The median and  
289 the lower and upper confidence limits of the number of individuals entering the “Mild  
290 symptoms” compartment at any day ( $n$ ) of the simulation is provided by the GLEAM framework  
291 ( $c_{p+m}^n$ ,  $c_{p+l}^n$ , and  $c_{p+u}^n$ , respectively), while the number of individuals leaving the compartment  
292 ( $c_{p-}^n$ ) was estimated similarly as in the framework:

$$293 \quad c_{p-}^n = c_p^n \div \mu,$$

294 where  $c_p^n$  stands for the average number of infected but not diagnosed asymptomatic or mild  
295 symptoms cases at day  $n$ . For each day ( $n$ ) of the simulation,  $c_p^n$  and its lower and upper  
296 confidence limits,  $c_{pl}^n$  and  $c_{pu}^n$ , were calculated as:

$$\begin{aligned} 297 \quad c_p^n &= c_p^{n-1} + c_{p+m}^n - c_p^{n-1}, \\ 298 \quad c_{pl}^n &= c_p^{n-1} + c_{p+l}^n - c_p^{n-1}, \\ 299 \quad c_{pu}^n &= c_p^{n-1} + c_{p+u}^n - c_p^{n-1}. \end{aligned}$$

300 The lower and upper confidence limits for  $c_s$ , respectively  $c_{sl}$  and  $c_{su}$ , used for comparison with  
301 confidence interval derived from the screening test, were obtained as:

$$\begin{aligned} 302 \quad c_{sl} &= (\sum_{n=126}^{139} c_{pl}^n) / (139 - 126), \text{ and} \\ 303 \quad c_{su} &= (\sum_{n=126}^{139} c_{pu}^n) / (139 - 126), \end{aligned}$$

304 where  $n = 126$  and  $n = 139$  stand for simulation steps referring to Mar 22<sup>nd</sup>, 2020, and Apr 2<sup>nd</sup>,  
305 2020, respectively.

306 The Excel workbook with performed calculations is provided as Supplementary Workbook 1.

## 307 Results

308 The simulation modelled the pandemic spread for 154 days. The results for all subpopulations  
309 around the globe are available in the shared model file (see the **Data Sharing** section below).

310 As overall data on the pandemic dynamics around the globe is likely to be biased by regions,  
311 often considerable in size and population, for which official statistics might be inaccurate, we  
312 decided not to compare overall model results with global data. Instead, we limited the analysis of  
313 results to twenty countries across five continents which are, in our belief: a) divergent in the  
314 proportion of the tested population (as reported in <https://ourworldindata.org/coronavirus-testing-source-data>), quality of healthcare, and strength of undertaken preventative measures; b)  
315 likely to provide the public with real data. We also compared the model outcome for the New  
316 York area subpopulation with the results obtained in a random screening test on women admitted  
317 for delivery (Sutton et al., 2020).

318 The obtained 95% confidence intervals of predicted numbers of diagnosed patients were  
319 compared with empirical data from twenty countries. In **Figure 2**, we present a percentage  
320 difference over time between the number of reported confirmed cases and confidence interval  
321 limits for modelled predictions. Positive values state that the model overestimates the number of  
322 diagnosed cases; negative values indicate the underestimations of the model; for the observed  
323 numbers of diagnosed cases that are within the model's CIs the percentage difference is equal to  
324 0. For most of the selected countries, the model predictions fit well to the observed data,  
325 especially in the early stages of the pandemic.

326 Additionally, **Figure 3** confronts the number of actual confirmed COVID-19 cases with  
327 confidence intervals for the modelled number of diagnosed cases in twenty selected countries  
328 from five continents for all 154 days of the simulation. Some countries present epidemic  
329 dynamics different from the model. However, the direction of these deviations may be explained  
330 by the measures overtaken by their governments, their societal response, or the number of tests  
331 carried per million of citizens. To show the possible influence of Non-Drug Interventions, we  
332 summarized them and marked the dates of their introduction in the country charts. Even though it  
333 is difficult to assess the effectiveness of precautions without detailed reports from the country in  
334 question, in some cases they seem to explain the observed discrepancies well. For instance the  
335 number of detected cases in Japan, Australia and New Zealand is much smaller than predicted by  
336



337 the model, which might be the result of the ban on flights from China introduced at the beginning  
338 of February combined with a geographical isolation of these countries. In contrast, most  
339 European countries started introducing preventive actions in March and the potential effects are  
340 only slightly visible in the last days of simulation. Similarly, the lack of concordance between  
341 model and empirical data in the case of the Republic of Korea may also be caused by the  
342 introduced precautions. However, in this case the preventive actions were of a different nature  
343 and are not shown in the country chart. Namely, the Republic of Korea introduced what was  
344 considered one of the largest and best-organised epidemic control programs in the world,  
345 consisting of measures to screen and isolate any infected people, as well as track and quarantine  
346 those who contacted them (South Korean Ministry of Health and Welfare).

347 Furthermore, the empirical data from the last day of the simulation, Apr 19<sup>th</sup>, 2020, was  
348 juxtaposed with the obtained confidence intervals in a single plot for all countries (**Figure 4**). In  
349 this plot the number of detected cases is presented as a percentage of the country population, in  
350 order to better show the width of the obtained confidence intervals in relation to the entire  
351 country population. From **Figure 4** it is visible that model predictions are generally within the  
352 same order of magnitude as the observed data. So are the differences between upper and lower  
353 confidence limits.

354 Finally, for the New York area and the time period between March 22<sup>nd</sup>, 2020 and April 2<sup>nd</sup>,  
355 2020, we compared the model outcome with the results of a random screening test conducted on  
356 women admitted for delivery (Sutton et al., 2020). The cited experimental study revealed that out  
357 of 214 women tested, 33 were positively diagnosed with COVID-19, of which 4 had mild  
358 symptoms and 29 were asymptomatic. Assuming pregnant women are representative of the  
359 entire population and omitting severe COVID-19 cases from calculations (given patients in late  
360 pregnancy showing severe symptoms would have been admitted to the hospital earlier), the 95%  
361 CI for the true population proportion of mild or asymptomatic cases in the New York area,  
362 averaged over the examined period, is 0.11 - 0.21. According to our model, in the same area and  
363 averaged over the same period, the 95% CI for this proportion is 0.19 - 0.23. Although the  
364 predicted CI is not fully enclosed by the CI of the experimental result, their large overlap  
365 suggests high quality and accuracy of the model, started 139 days earlier from a single case on  
366 the other side of the globe.

367 Altogether, our 154-day long simulations of the pandemic seem to reflect the empirical data well.  
368 However, as is in the case of any model, this reflection is not perfect. The main reason for the  
369 discrepancies between model predictions and the reported number of COVID-19 cases is the fast  
370 governmental responses and early introduced precautions, which significantly influence the pace  
371 of the disease spread. Such preventive measures, for instance local flight bans, are not included  
372 in our simulations. In fact, the model depicts only the “natural” dynamics of the pandemic in the  
373 situation when governments do nothing to stop it. This means that in countries where overtaken  
374 actions were fast and effective, the model has a tendency to overestimate the number of detected  
375 cases.

376 The second potential reason for the observed discrepancies between model results and empirical  
377 data is the increase of the virus detectability in countries where the proportion of tested  
378 individuals is larger, leading to higher *tDR* than the one assumed in our model. To check this  
379 hypothesis, we calculated 95% confidence intervals for the Spearman correlation coefficient  
380 between: a) the cumulative number of conducted tests per capita in a country, and b) the  
381 percentage difference between the cumulative number of detected cases and the lower or upper  
382 confidence limit of the CIs obtained in the model (i.e. if the model underestimates the number of

383 detected cases, its upper confidence limit is used in calculations, and *vice versa*; if the observed  
384 data is within the predictions of the model, the difference is zero). The correlations' CIs were  
385 calculated separately for each day of the simulation, if only sufficient data on countries' testing  
386 effort were available in the datasource. Missing data on the number of carried tests were  
387 interpolated if possible. As some countries started testing earlier than others, the number of  
388 datapoints for correlations varies from 4 to 18, depending on the date. The obtained CIs for  
389 correlations are plotted on a timeline in **Figure 5**. It is visible that within the used data and with a  
390 limited sample size of 4 to 18 countries, it is not possible to state the direction of the correlation  
391 and decide if the tested hypothesis is true.

392 We believe that further modelling efforts, that will include careful parameters' modifications  
393 over time in order to better reflect local responses to the pandemic, would greatly improve the  
394 accuracy of the simulations, but it is outside of the scope of this work.

### 395 **Data sharing**

396 The model and the results of the simulation are freely available at  
397 <https://github.com/freesci/covid19>.

398 The data used to generate **Figure 5** is provided as **Supplementary Table 1**.

399 The data and calculations used to obtain confidence intervals for the proportion of the mild and  
400 asymptomatic cases in the New York area is provided as **Supplementary Workbook 1**.

### 401 **Discussion**

402 The presented model, due to its stochastic nature, avoids the problem of biased and inaccurate  
403 data and provides simulations of the pandemic spread for all the countries around the globe. It  
404 also has multiple implications concerning the major characteristics of the COVID-19 pandemic,  
405 such as the basic reproduction number of the virus  $R_0$  (higher than previously assumed, yet not  
406 above the values estimated for other coronaviruses), and the average ratio of diagnosed cases  
407  $tDR$  (much lower than assumed so far, especially for cases expressing mild symptoms and  
408 asymptomatic). Such a low  $tDR$  would indicate that the vast majority of the COVID-19  
409 infections are so mild that they pass unnoticed. This is not implausible, considering the fact that  
410 there are 1.9 billion children aged below 15 years in the world (27% of the global population)  
411 and predominantly (ca. 90%) the course of their infections is mild or asymptomatic (Dong et al.,  
412 2020). Additionally, the  $tDR$  used in our model indicates virus detectability averaged over the  
413 entire period of 154 days and over all countries in the world. Furthermore, some COVID-19  
414 cases may show atypical symptoms (e.g. diarrhoea) (Gao, Chen & Fang, 2020) which hinder  
415 correct diagnosis. Taking all this into account, plus the results of our model and latest reports on  
416 the low detectability of the virus (Nishiura et al., 2020; Li et al., 2020a; Day, 2020a,b; Kimball et  
417 al., 2020), one may risk a hypothesis that the virus is already more prevalent in the global  
418 population than shown in official statistics at the moment, and consequently, its mortality rate is  
419 much lower.

420 To verify this hypothesis, further actions are required. At first, the model should be refined by  
421 stochastic fitting of parameters to the observed data. Also the sensitivity analysis of the  
422 parameters should be performed. Such a refined model could be used for the analysis of the  
423 effectiveness of the applied Non-Drug Interventions and possibly, for the modelling of future  
424 NDI strategies. Secondly, a simulation with the  $tDR$  parameter increasing over time or

425 diverging geographically might better reflect the actual virus detectability in the course of the  
426 pandemic.

427 Finally, the real spread of the virus should be assessed empirically by conducting a sufficient  
428 number of tests on fully random samples as currently, most tests are limited to individuals with  
429 strong and typical symptoms. Only after obtaining a solid measurement of the actual prevalence  
430 of the virus, can one draw conclusions about its true mortality rate.

431 We emphasize that our conclusions are a hypothesis based on a single computational model and  
432 without empirical verification, but they serve as a platform for further research. At this stage, by  
433 no means should they be used as a reason for governmental decisions on lifting the precautions.  
434 Even if the true mortality of the virus is indeed lower than announced by the media, to our best  
435 knowledge many people remain in the high-risk group (e.g elderly, chronically ill, etc. (Baud et  
436 al., 2020)). Lack of population resistance facilitates their contact with the virus and may lead to a  
437 rapid increase of severe cases in a short time, as seen for example in Italy (Remuzzi & Remuzzi,  
438 2020), leading to the collapse of the healthcare system, which affects the entire society and  
439 results in many additional deaths not related to the virus itself. Careful use and tuning of Non-  
440 Drug Interventions, constant balancing of the disease spread and healthcare capacity, protecting  
441 the most vulnerable individuals, farsighted anticipation and agility in decision making may  
442 altogether be able to minimize the number of deaths without resulting in the global economic  
443 breakdown.

## 444 **Conclusions**

445 Our model implies that the current consensus on the basic reproduction number of SARS-CoV-2  
446 and its prevalence are misestimated. The overall global data on the pandemic dynamics seems  
447 strongly biased by large regions where official statistics may not reflect accurately the state of  
448 the epidemic, and by the fact that many COVID-19 cases may go unnoticed. The basic  
449 reproduction rate of the virus should be confirmed based on reliable data, and its prevalence  
450 determined by conducting properly designed screening tests.

## 451 **References**

- 452 Balcan D, Gonçalves B, Hu H, Ramasco JJ, Colizza V, Vespignani A. 2010. Modeling the spatial spread  
453 of infectious diseases: the GLObal Epidemic and Mobility computational model. *Journal of*  
454 *computational science* 1:132–145.
- 455 Baud D, Qi X, Nielsen-Saines K, Musso D, Pomar L, Favre G. 2020. Real estimates of mortality  
456 following COVID-19 infection. *The Lancet infectious diseases*. DOI: 10.1016/S1473-  
457 3099(20)30195-X.
- 458 Chen T-M, Rui J, Wang Q-P, Zhao Z-Y, Cui J-A, Yin L. 2020. A mathematical model for simulating the  
459 phase-based transmissibility of a novel coronavirus. *Infectious diseases of poverty* 9:24.
- 460 Cowling BJ, Ali ST, Ng TWY, Tsang TK, Li JCM, Fong MW, Liao Q, Kwan MYW, Lee SL, Chiu SS,

- 461 Wu JT, Wu P, Leung GM. Impact assessment of non-pharmaceutical interventions against COVID-  
462 19 and influenza in Hong Kong: an observational study. DOI: 10.1101/2020.03.12.20034660.
- 463 Day M. 2020a. Covid-19: identifying and isolating asymptomatic people helped eliminate virus in Italian  
464 village. *BMJ* 368:m1165.
- 465 Day M. 2020b. Covid-19: four fifths of cases are asymptomatic, China figures indicate. *BMJ* 369:m1375.
- 466 Dong E, Du H, Gardner L. 2020. An interactive web-based dashboard to track COVID-19 in real time.  
467 *The Lancet infectious diseases*. DOI: 10.1016/S1473-3099(20)30120-1.
- 468 Dong Y, Mo X, Hu Y, Qi X, Jiang F, Jiang Z, Tong S. 2020. Epidemiological Characteristics of 2143  
469 Pediatric Patients With 2019 Coronavirus Disease in China. *Pediatrics*. DOI: 10.1542/peds.2020-  
470 0702.
- 471 Ganyani T, Kremer C, Chen D, Torneri A, Faes C, Wallinga J, Hens N. 2020. Estimating the generation  
472 interval for COVID-19 based on symptom onset data. *medRxiv*.
- 473 Gao QY, Chen YX, Fang JY. 2020. 2019 Novel coronavirus infection and gastrointestinal tract. *Journal*  
474 *of digestive diseases*. DOI: 10.1111/1751-2980.12851.
- 475 Imai N, Cori A, Dorigatti I, Baguelin M, Donnelly CA, Riley S, Ferguson NM. 2020. Report 3:  
476 transmissibility of 2019-nCoV. *Reference Source*.
- 477 Kimball A, Hatfield KM, Arons M, James A, Taylor J, Spicer K, Bardossy AC, Oakley LP, Tanwar S,  
478 Chisty Z, Bell JM, Methner M, Harney J, Jacobs JR, Carlson CM, McLaughlin HP, Stone N, Clark  
479 S, Brostrom-Smith C, Page LC, Kay M, Lewis J, Russell D, Hiatt B, Gant J, Duchin JS, Clark TA,  
480 Honein MA, Reddy SC, Jernigan JA, Public Health – Seattle & King County, CDC COVID-19  
481 Investigation Team. 2020. Asymptomatic and Presymptomatic SARS-CoV-2 Infections in Residents  
482 of a Long-Term Care Skilled Nursing Facility - King County, Washington, March 2020. *MMWR*.  
483 *Morbidity and mortality weekly report* 69:377–381.
- 484 Kucharski AJ, Russell TW, Diamond C, Liu Y, Edmunds J, Funk S, Eggo RM, Centre for Mathematical  
485 Modelling of Infectious Diseases COVID-19 working group. 2020. Early dynamics of transmission  
486 and control of COVID-19: a mathematical modelling study. *The Lancet infectious diseases*. DOI:

- 487 10.1016/S1473-3099(20)30144-4.
- 488 Lauer SA, Grantz KH, Bi Q, Jones FK, Zheng Q, Meredith HR, Azman AS, Reich NG, Lessler J. 2020.
- 489 The Incubation Period of Coronavirus Disease 2019 (COVID-19) From Publicly Reported
- 490 Confirmed Cases: Estimation and Application. *Annals of internal medicine*. DOI: 10.7326/M20-
- 491 0504.
- 492 Lavezzo E, Franchin E, Ciavarella C, Cuomo-Dannenburg G, Barzon L, Del Vecchio C, Rossi L,
- 493 Manganelli R, Loregian A, Navarin N, Abate D, Sciro M, Merigliano S, Decanale E, Vanuzzo MC,
- 494 Saluzzo F, Onelia F, Pacenti M, Parisi S, Carretta G, Donato D, Flor L, Cocchio S, Masi G, Sperduti
- 495 A, Cattarino L, Salvador R, Gaythorpe KAM, Imperial College London COVID-19 Response Team,
- 496 Brazzale AR, Toppo S, Trevisan M, Baldo V, Donnelly CA, Ferguson NM, Dorigatti I, Crisanti A.
- 497 2020. Suppression of COVID-19 outbreak in the municipality of Vo, Italy.
- 498 *medRxiv:2020.04.17.20053157*.
- 499 Lin Q, Zhao S, Gao D, Lou Y, Yang S, Musa SS, Wang MH, Cai Y, Wang W, Yang L, He D. 2020. A
- 500 conceptual model for the coronavirus disease 2019 (COVID-19) outbreak in Wuhan, China with
- 501 individual reaction and governmental action. *International journal of infectious diseases: IJID:*
- 502 *official publication of the International Society for Infectious Diseases* 93:211–216.
- 503 Li R, Pei S, Chen B, Song Y, Zhang T, Yang W, Shaman J. 2020a. Substantial undocumented infection
- 504 facilitates the rapid dissemination of novel coronavirus (SARS-CoV2). *Science*. DOI:
- 505 10.1126/science.abb3221.
- 506 Liu Y, Gayle AA, Wilder-Smith A, Rocklöv J. 2020. The reproductive number of COVID-19 is higher
- 507 compared to SARS coronavirus. *Journal of travel medicine* 27. DOI: 10.1093/jtm/taaa021.
- 508 Li X, Zai J, Zhao Q, Nie Q, Li Y, Foley BT, Chaillon A. 2020b. Evolutionary history, potential
- 509 intermediate animal host, and cross-species analyses of SARS-CoV-2. *Journal of medical virology*.
- 510 DOI: 10.1002/jmv.25731.
- 511 Majumder M, Mandl KD. Early Transmissibility Assessment of a Novel Coronavirus in Wuhan, China.
- 512 *SSRN Electronic Journal*. DOI: 10.2139/ssrn.3524675.



- 513 Nishiura H, Kobayashi T, Suzuki A, Jung S-M, Hayashi K, Kinoshita R, Yang Y, Yuan B,  
514 Akhmetzhanov AR, Linton NM, Miyama T. 2020. Estimation of the asymptomatic ratio of novel  
515 coronavirus infections (COVID-19). *International journal of infectious diseases: IJID: official*  
516 *publication of the International Society for Infectious Diseases*. DOI: 10.1016/j.ijid.2020.03.020.
- 517 Ota M. 2020. Will we see protection or reinfection in COVID-19? *Nature reviews. Immunology*. DOI:  
518 10.1038/s41577-020-0316-3.
- 519 Pan Y, Long L, Zhang D, Yan T, Cui S, Yang P, Wang Q, Ren S. 2020. Potential false-negative nucleic  
520 acid testing results for Severe Acute Respiratory Syndrome Coronavirus 2 from thermal inactivation  
521 of samples with low viral loads. *Clinical chemistry*. DOI: 10.1093/clinchem/hvaa091.
- 522 Read JM, Bridgen JRE, Cummings DAT, Ho A, Jewell CP. 2020. Novel coronavirus 2019-nCoV: early  
523 estimation of epidemiological parameters and epidemic predictions. *medRxiv*.
- 524 Remuzzi A, Remuzzi G. 2020. COVID-19 and Italy: what next? *The Lancet* 395:1225–1228.
- 525 South Korean Ministry of Health and Welfare. Coronavirus disease 19(COVID-19). *Available at*  
526 *<http://ncov.mohw.go.kr/en/>* (accessed April 25, 2020).
- 527 Statement on the meeting of the International Health Regulations (2005) Emergency Committee regarding  
528 the outbreak of novel coronavirus 2019 (n-CoV) on 23 January 2020. *Available at*  
529 *[https://www.who.int/news-room/detail/23-01-2020-statement-on-the-meeting-of-the-international-](https://www.who.int/news-room/detail/23-01-2020-statement-on-the-meeting-of-the-international-health-regulations-(2005)-emergency-committee-regarding-the-outbreak-of-novel-coronavirus-(2019-ncov))*  
530 *[health-regulations-\(2005\)-emergency-committee-regarding-the-outbreak-of-novel-coronavirus-](https://www.who.int/news-room/detail/23-01-2020-statement-on-the-meeting-of-the-international-health-regulations-(2005)-emergency-committee-regarding-the-outbreak-of-novel-coronavirus-(2019-ncov))*  
531  *[\(2019-ncov\)](https://www.who.int/news-room/detail/23-01-2020-statement-on-the-meeting-of-the-international-health-regulations-(2005)-emergency-committee-regarding-the-outbreak-of-novel-coronavirus-(2019-ncov))* (accessed April 23, 2020).
- 532 Statement on the second meeting of the International Health Regulations (2005) Emergency Committee  
533 regarding the outbreak of novel coronavirus (2019-nCoV). *Available at [https://www.who.int/news-](https://www.who.int/news-room/detail/30-01-2020-statement-on-the-second-meeting-of-the-international-health-regulations-(2005)-emergency-committee-regarding-the-outbreak-of-novel-coronavirus-(2019-ncov))*  
534 *[room/detail/30-01-2020-statement-on-the-second-meeting-of-the-international-health-regulations-](https://www.who.int/news-room/detail/30-01-2020-statement-on-the-second-meeting-of-the-international-health-regulations-(2005)-emergency-committee-regarding-the-outbreak-of-novel-coronavirus-(2019-ncov))*  
535  *[\(2005\)-emergency-committee-regarding-the-outbreak-of-novel-coronavirus-\(2019-ncov\)](https://www.who.int/news-room/detail/30-01-2020-statement-on-the-second-meeting-of-the-international-health-regulations-(2005)-emergency-committee-regarding-the-outbreak-of-novel-coronavirus-(2019-ncov))* (accessed  
536 March 20, 2020).
- 537 Steven Sanche, Yen Ting Lin, Chonggang Xu, Ethan Romero-Severson, Nick Hengartner, Ruian Ke.  
538 2020. High Contagiousness and Rapid Spread of Severe Acute Respiratory Syndrome Coronavirus

- 539 2. *Emerging Infectious Disease journal* 26. DOI: 10.3201/eid2607.200282.
- 540 Streeck H, Hartmann G, Exner M, Schmid M. 2020. Preliminary result and conclusions of the COVID-19  
541 case cluster study (Gangelt Municipality). *Available at:*  
542 [https://www.land.nrw/sites/default/files/asset/document/zwischenenergebnis\\_covid19\\_case\\_study\\_gan](https://www.land.nrw/sites/default/files/asset/document/zwischenenergebnis_covid19_case_study_gangelt_en.pdf)  
543 [gelt\\_en.pdf](https://www.land.nrw/sites/default/files/asset/document/zwischenenergebnis_covid19_case_study_gangelt_en.pdf) (accessed April 29, 2020).
- 544 Sutton D, Fuchs K, D’Alton M, Goffman D. 2020. Universal Screening for SARS-CoV-2 in Women  
545 Admitted for Delivery. *The New England journal of medicine*. DOI: 10.1056/NEJMc2009316.
- 546 Tizzoni M, Bajardi P, Poletto C, Ramasco JJ, Balcan D, Gonçalves B, Perra N, Colizza V, Vespignani A.  
547 2012. Real-time numerical forecast of global epidemic spreading: case study of 2009 A/H1N1pdm.  
548 *BMC medicine* 10:165.
- 549 Tong Z-D, Tang A, Li K-F, Li P, Wang H-L, Yi J-P, Zhang Y-L, Yan J-B. 2020. Potential  
550 Presymptomatic Transmission of SARS-CoV-2, Zhejiang Province, China, 2020. *Emerging*  
551 *infectious diseases* 26. DOI: 10.3201/eid2605.200198.
- 552 Van den Broeck W, Gioannini C, Gonçalves B, Quagiotto M, Colizza V, Vespignani A. 2011. The  
553 GLEaMviz computational tool, a publicly available software to explore realistic epidemic spreading  
554 scenarios at the global scale. *BMC infectious diseases* 11:37.
- 555 Verity R, Okell LC, Dorigatti I, Winskill P, Whittaker C, Imai N, Cuomo-Dannenburg G, Thompson H,  
556 Walker P, Fu H, Dighe A, Griffin J, Cori A, Baguelin M, Bhatia S, Boonyasiri A, Cucunuba ZM,  
557 Fitzjohn R, Gaythorpe KAM, Green W, Hamlet A, Hinsley W, Laydon D, Nedjati-Gilani G, Riley S,  
558 van-Elsand S, Volz E, Wang H, Wang Y, Xi X, Donnelly C, Ghani A, Ferguson N. 2020. Estimates  
559 of the severity of COVID-19 disease. *medRxiv:2020.03.09.20033357*.
- 560 Wallinga J, Teunis P. 2004. Different epidemic curves for severe acute respiratory syndrome reveal  
561 similar impacts of control measures. *American journal of epidemiology* 160:509–516.
- 562 Woelfel R, Corman VM, Guggemos W, Seilmaier M, Zange S, Mueller MA, Niemeyer D, Vollmar P,  
563 Rothe C, Hoelscher M, Others. 2020. Clinical presentation and virological assessment of  
564 hospitalized cases of coronavirus disease 2019 in a travel-associated transmission cluster. *medRxiv*.

565 Wu JT, Leung K, Bushman M, Kishore N, Niehus R, de Salazar PM, Cowling BJ, Lipsitch M, Leung  
566 GM. 2020. Estimating clinical severity of COVID-19 from the transmission dynamics in Wuhan,  
567 China. *Nature medicine* 26:506–510.

568 Wu JT, Leung K, Leung GM. 2020. Nowcasting and forecasting the potential domestic and international  
569 spread of the 2019-nCoV outbreak originating in Wuhan, China: a modelling study. *The Lancet*  
570 395:689–697.

571 Zhang S, Diao M, Yu W, Pei L, Lin Z, Chen D. 2020. Estimation of the reproductive number of novel  
572 coronavirus (COVID-19) and the probable outbreak size on the Diamond Princess cruise ship: A  
573 data-driven analysis. *International journal of infectious diseases: IJID: official publication of the*  
574 *International Society for Infectious Diseases* 93:201–204.

575 Zhao S, Lin Q, Ran J, Musa SS, Yang G, Wang W, Lou Y, Gao D, Yang L, He D, Wang MH.  
576 Preliminary estimation of the basic reproduction number of novel coronavirus (2019-nCoV) in  
577 China, from 2019 to 2020: A data-driven analysis in the early phase of the outbreak. DOI:  
578 10.1101/2020.01.23.916395.

579 Zhou F, Yu T, Du R, Fan G, Liu Y, Liu Z, Xiang J, Wang Y, Song B, Gu X, Guan L, Wei Y, Li H, Wu X,  
580 Xu J, Tu S, Zhang Y, Chen H, Cao B. 2020. Clinical course and risk factors for mortality of adult  
581 inpatients with COVID-19 in Wuhan, China: a retrospective cohort study. *The Lancet*. DOI:  
582 10.1016/S0140-6736(20)30566-3.

583

584

585

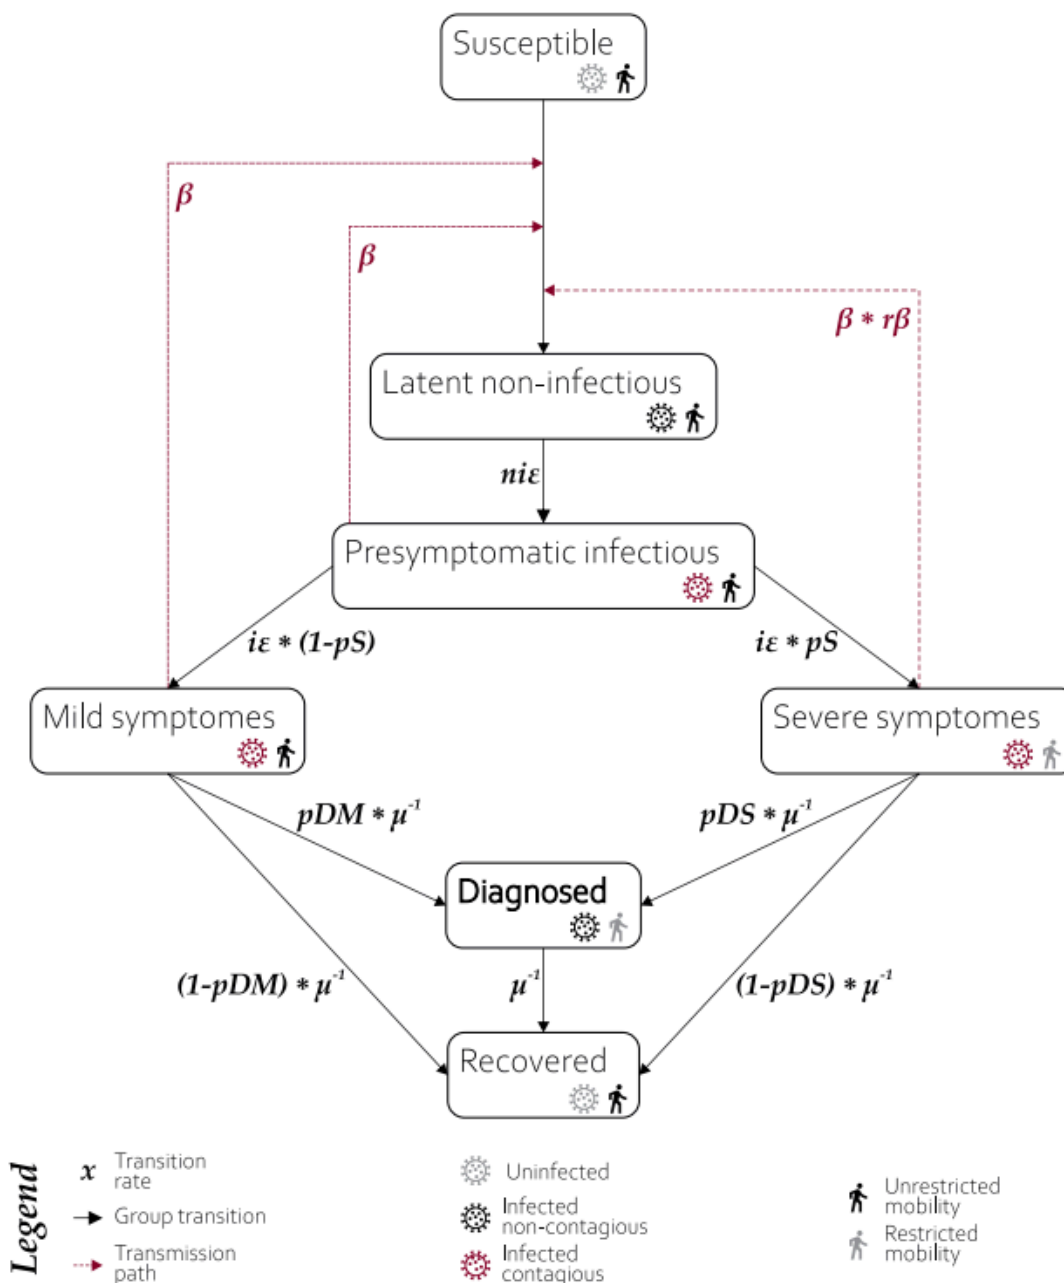

586

587 *Figure 1: Structure of compartments used in modelling.*

588 A susceptible individual in contact with a person: 1) presymptomatic, 2) who developed mild  
 589 symptoms, or 3) who developed severe symptoms, may contract the infection at rate  $\beta$ ,  $\beta$  or  $r\beta^*\beta$ ,  
 590 respectively, and enter the latent non-infectious compartment where he is infected but not yet  
 591 infectious. During the non-infectious period, each individual has a probability of  $ni\epsilon$  of becoming

592 presymptomatic infectious. The presymptomatic cases have probability  $i\varepsilon$  of developing severe  
593 or mild COVID-19 symptoms, with probabilities  $pS$  and  $1-pS$ , respectively. The transition from  
594 both symptomatic groups occurs at  $\mu$  rate. Individuals who developed severe symptoms do not  
595 travel within and between modelled subpopulations and may be either diagnosed with probability  
596  $pDS$ , or recover with probability of  $1-pDS$ . Individuals whose mild (or non-existent) symptoms  
597 are not stopping them from traveling may be diagnosed with probability  $pDM$  or recover with  
598 probability  $1-pDM$ . The diagnosed individuals are considered isolated and effectively non-  
599 contagious and recover with rate  $\mu$ . The recovery does not discriminate between true recovery  
600 and fatal cases.  
601



602

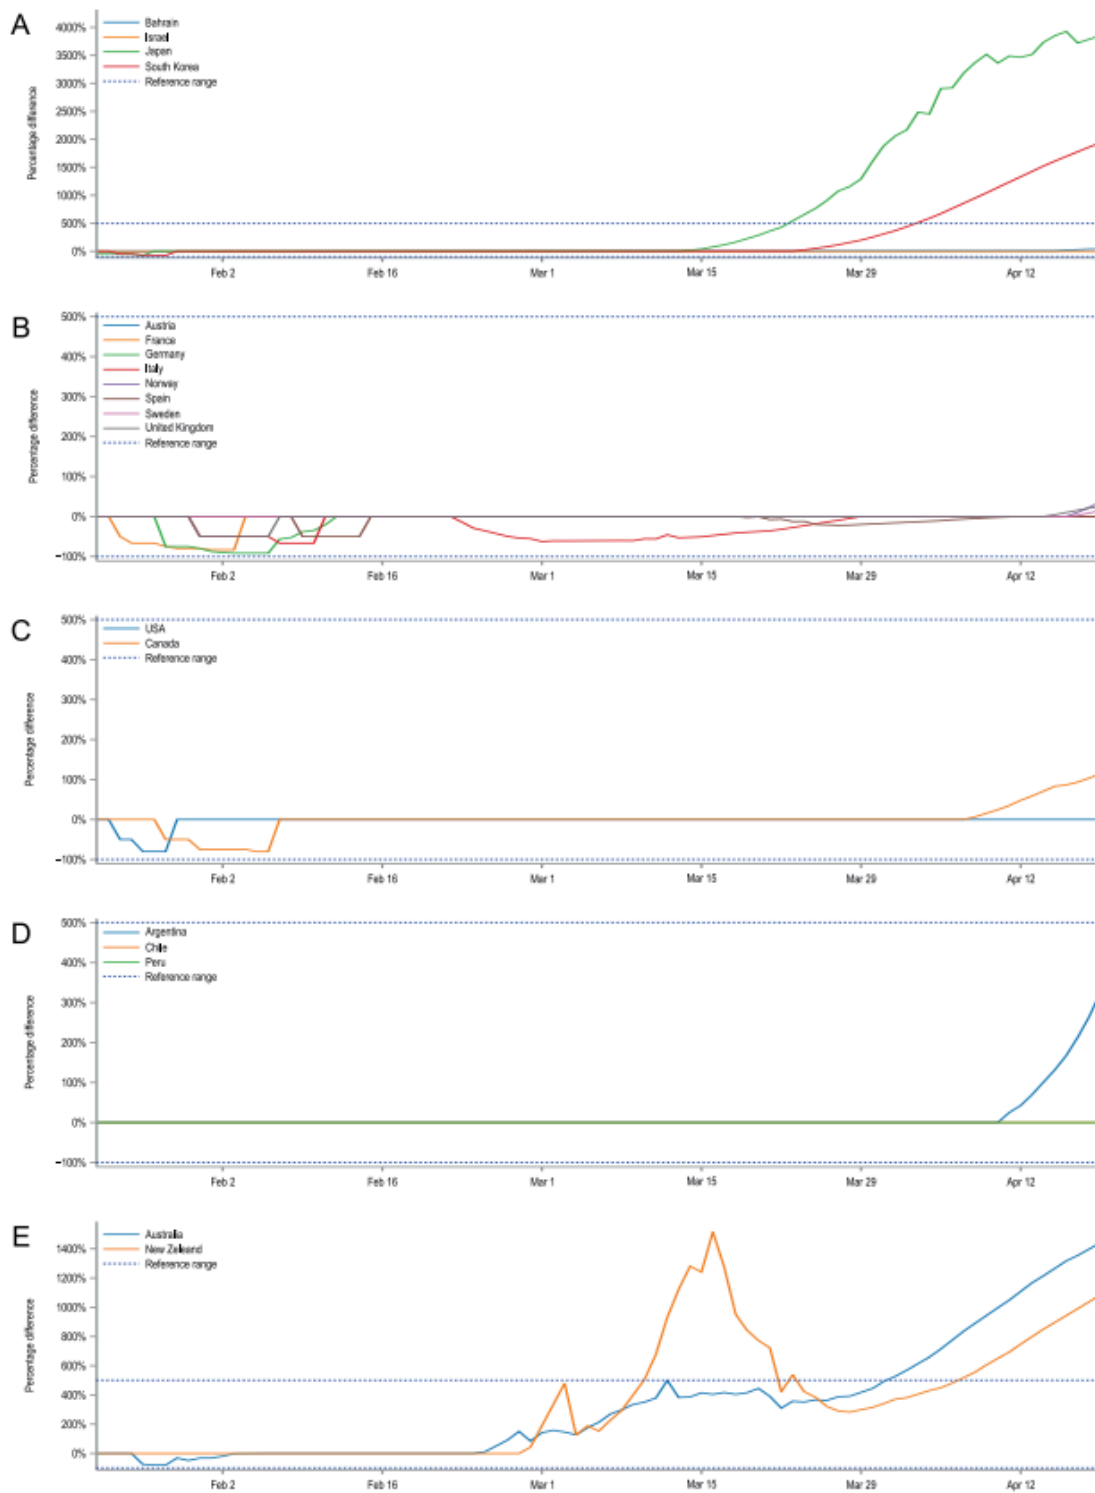

603

604  
605  
606  
607  
608  
609  
610  
611  
612  
613  
614

*Figure 2: Percentage difference over time between the number of reported cases and confidence intervals' limits for modelled predictions.*  
Positive values state that the model overestimates the number of diagnosed cases, negative values indicate the underestimations of the model. Observed numbers of cases that are within the model CIs are equal to 0. For clarity, country plots were grouped by continents and presented in five plots: **A:** Asia, **B:** Europe, **C:** North America, **D:** South America, **E:** Australia and Oceania. The large discrepancies for Japan, Australia, New Zealand and the Republic of Korea are putatively caused by the fast and pronounced reaction of their governments and early introduced NDIs which are not reflected in our model.

615  
616

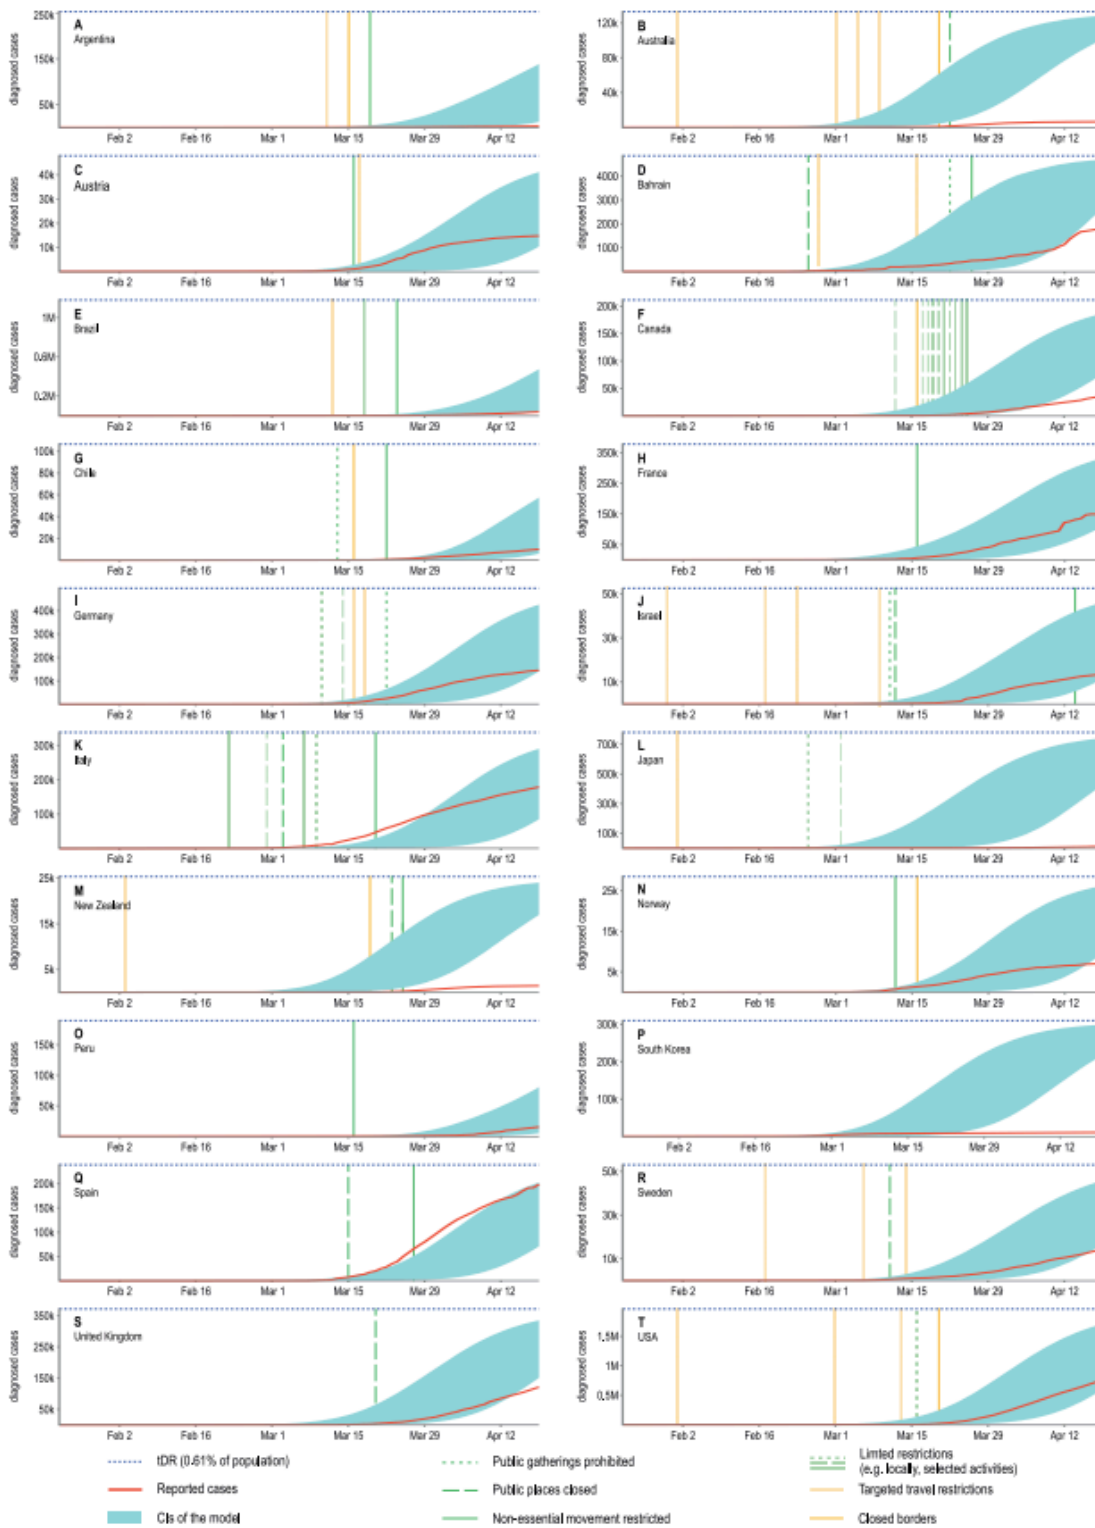

617

618  
619  
620  
621  
622  
623  
624  
625  
626  
627  
628  
629  
630

*Figure 3: An overlay of modelled confidence intervals for the predicted cumulative number of diagnosed cases and the actual reported values shown for twenty selected countries. The y-axes show the absolute number of diagnosed cases and due to different country populations are not unified. To facilitate comparisons a blue, dotted line was added as a reference indicating the 0.61% of the total population of a country. This value is the same as the **tDR** parameter used in our model reflecting the assumed ratio of detected to undetected cases. The confidence intervals obtained in our model will approach this value asymptotically. For most countries, observations agree well with model predictions. The observed discrepancies are most likely due to introduced NDIs which are not included in our model. The precautions were categorized and the dates of their introductions were marked on the plots with vertical lines, however, the assessment of their effectiveness is beyond the scope of this research.*

631  
632

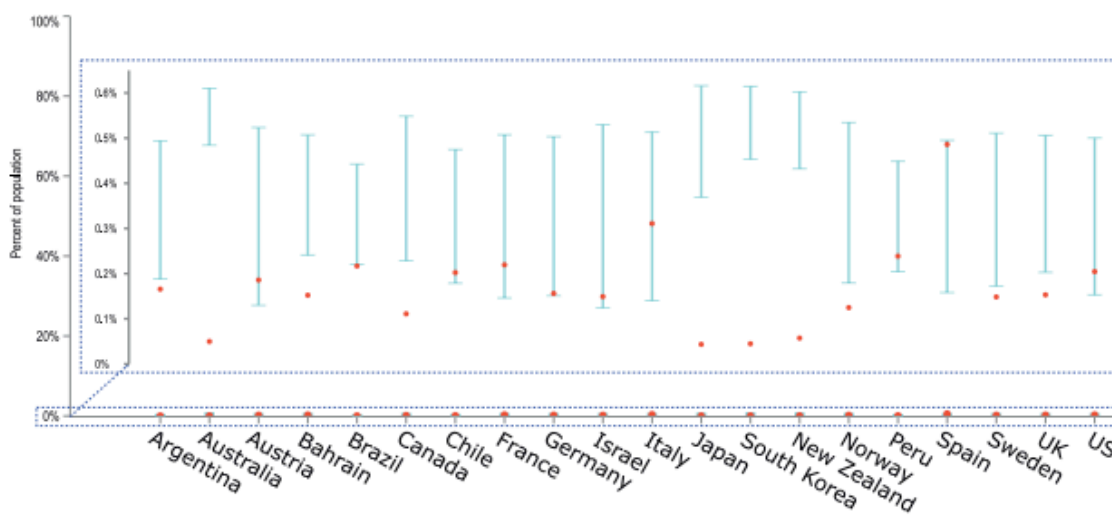

633  
634  
635  
636  
637  
638  
639  
640  
641

*Figure 4: An overlay of modelled confidence intervals with the empirical data on the number of diagnosed cases for the last day of the simulation, Apr 19<sup>th</sup>, 2020. The cumulative number of diagnosed cases is presented as a percentage of the country population, facilitating comparisons between countries. Model predictions are generally within the same order of magnitude as the observed data and obtained CIs are relatively narrow despite a limited number of iterations (20).*



642

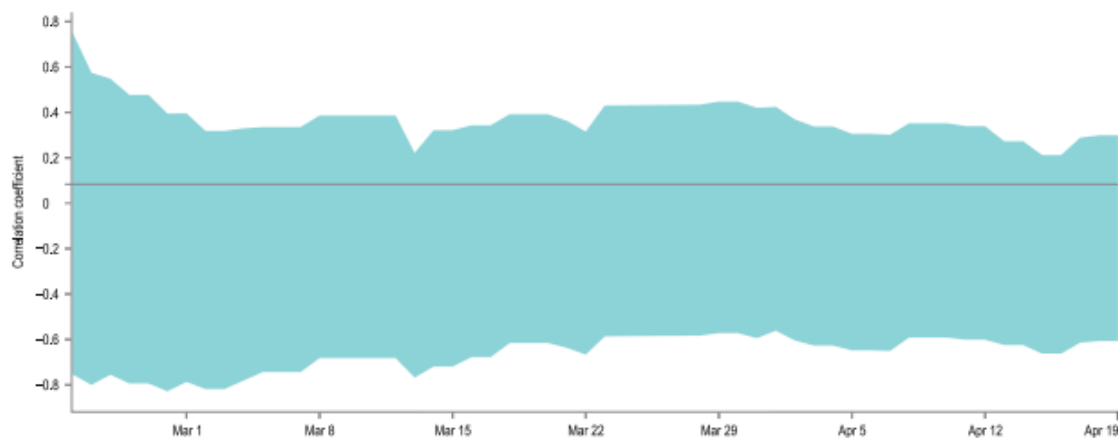

643

644

645 *Figure 5: Correlation between presented model accuracy and per-country testing effort.*

646 An overlay of 95% confidence intervals for the Spearman correlation coefficients between: 1)

647 the interpolated, cumulative number of conducted tests per capita in a country, and 2)

648 the percentage difference between the actual number of detected cases and the lower or upper

649 confidence limit of the CIs obtained in the model. The correlations were calculated separately for

650 each day of the simulation if only sufficient data on testing effort is available. As some countries

651 started testing earlier than others, the number of data points for correlations varies from 4 to 18,

652 depending on the date. The width of the obtained CIs and the values of their limits indicate that

653 with the available data it is not possible to state the direction of the analyzed correlations.

654

655

656

| Parameter       | Value    | Description                                                                                           | Source/Derivation                                                                                                                                                                               |
|-----------------|----------|-------------------------------------------------------------------------------------------------------|-------------------------------------------------------------------------------------------------------------------------------------------------------------------------------------------------|
| $R_0$           | 4.4      | Reproduction number for SARS-CoV-2                                                                    | Literature-based: assumed on the basis of infectivity rates of other coronaviruses.                                                                                                             |
| $\mu$           | 7 days   | Average recovery time since symptoms development                                                      | Literature-based                                                                                                                                                                                |
| $\beta$         | 0.38261  | Transmission rate                                                                                     | $\mu \div R_0$                                                                                                                                                                                  |
| $r\beta$        | 0.5      | Reduction in transmission rate resulting from the undiagnosed development of severe COVID-19 symptoms | Literature-based                                                                                                                                                                                |
| $lp$            | 5.6 days | Average latency period                                                                                | Literature-based                                                                                                                                                                                |
| $lnip$          | 1.1 days | Average latent non-infectious period                                                                  | Literature-based: assumed on basis of non-infectious period of Influenza A/H1N1                                                                                                                 |
| $pip$           | 4.5 days | Average presymptomatic infectious period                                                              | $lp - lnip$                                                                                                                                                                                     |
| $ni\varepsilon$ | 0.9(09)  | Probability of transition from $lnip$ to $pip$ state                                                  | $1 \div lnip$                                                                                                                                                                                   |
| $i\varepsilon$  | 0.2(2)   | Probability of transition from presymptomatic to symptomatic state                                    | $1 \div (lp - lnip)$                                                                                                                                                                            |
| $pS$            | 0.01     | Probability of developing severe COVID-19 symptoms                                                    | Literature-data: The most often reported ratio of severe to mild symptoms                                                                                                                       |
| $pDS$           | 0.6      | Probability of being diagnosed when expressing severe COVID-19 symptoms                               | Assumed, taking into account that:<br>1. In elderly patients, COVID may be easily misdiagnosed,<br>2. Most of the countries in the world do not have sufficiently efficient healthcare systems. |
| $tDR$           | 0.0061   | Rate of diagnosed SARS-CoV-2 infected individuals                                                     | Value representing the smallest possible detectability $> pS * pDS$                                                                                                                             |
| $pDM$           | 0.00(01) | Probability of being diagnosed when presenting mild or none COVID-19 symptoms                         | $(tDR - pS * pDS) \div (1 - pS)$                                                                                                                                                                |

657  
658

659 Table 1. List of parameters used for the models and their respective values.
